# Supplementary material for: Homo- and heterobinuclear Cu2+ and Zn2+ complexes of abiotic cyclic hexaazapyridinocyclophanes as SOD mimics
Source: Royal Society of Chemistry journal article supplement (doi:10.1039/c3dt51012c), 2013-01-01

## Supporting Information

### **Homo- and Heterobinuclear Cu<sup>2+</sup> and Zn<sup>2+</sup> Complexes of Abiotic Cyclic Hexaazapyridinocyclophanes As SOD Mimics**

Raquel Belda, Salvador Blasco, Begoña Verdejo, Hermás R. Jiménez, Antonio Doménech, Conxa Soriano, Julio Latorre, Carmen Terencio and Enrique García-España.

- **Fig. S1** Distribution diagram of receptor **L1**
- **Fig. S2** X-ray crystal structure for [(CuH<sub>4</sub>**L2**)(H<sub>2</sub>O)(ClO<sub>4</sub>)] (ClO<sub>4</sub>)<sub>5</sub> · 3(H<sub>2</sub>O)
- **Table S1** Crystallographic Data for [(CuH<sub>4</sub>**L2**)(H<sub>2</sub>O)(ClO<sub>4</sub>)] (ClO<sub>4</sub>)<sub>5</sub> · 3(H<sub>2</sub>O)
- **Fig. S3** Distribution diagram for the system Cu<sup>2+</sup>-**L1**.
- **Fig. S4** Distribution diagram for the system Zn<sup>2+</sup>-**L1**.
- **Fig. S5** 400 MHz proton NMR spectra in D<sub>2</sub>O at 313 K of Cu<sub>2</sub>**L2**-Im and Cu<sub>2</sub>**L2** at pH 7.0.
- **Table S2** <sup>1</sup>H NMR hyperfine-shifted resonances of Cu<sub>2</sub>**L2**, Cu<sub>2</sub>**L2**Im complexes in D<sub>2</sub>O at 313 K and pH 7.0.
- **Scheme S1**

**Fig. S1** Distribution diagram of receptor **L1**

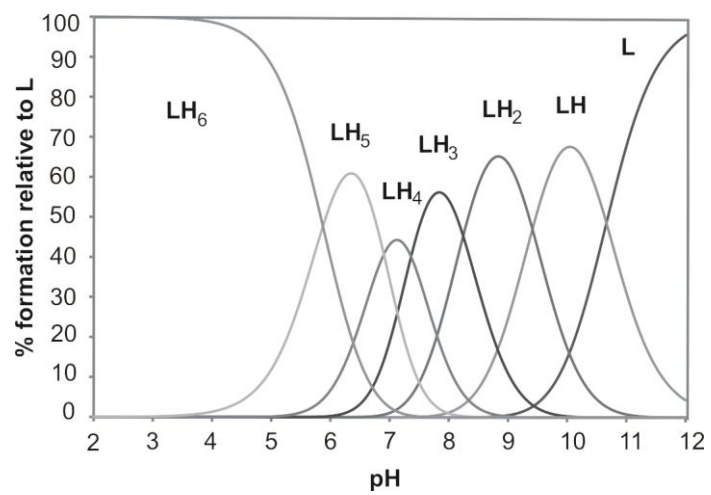

**Fig. S2** X-ray crystal structure for  $[(\text{CuH}_4\text{L2})(\text{H}_2\text{O})(\text{ClO}_4)] (\text{ClO}_4)_5 \cdot 3(\text{H}_2\text{O})$

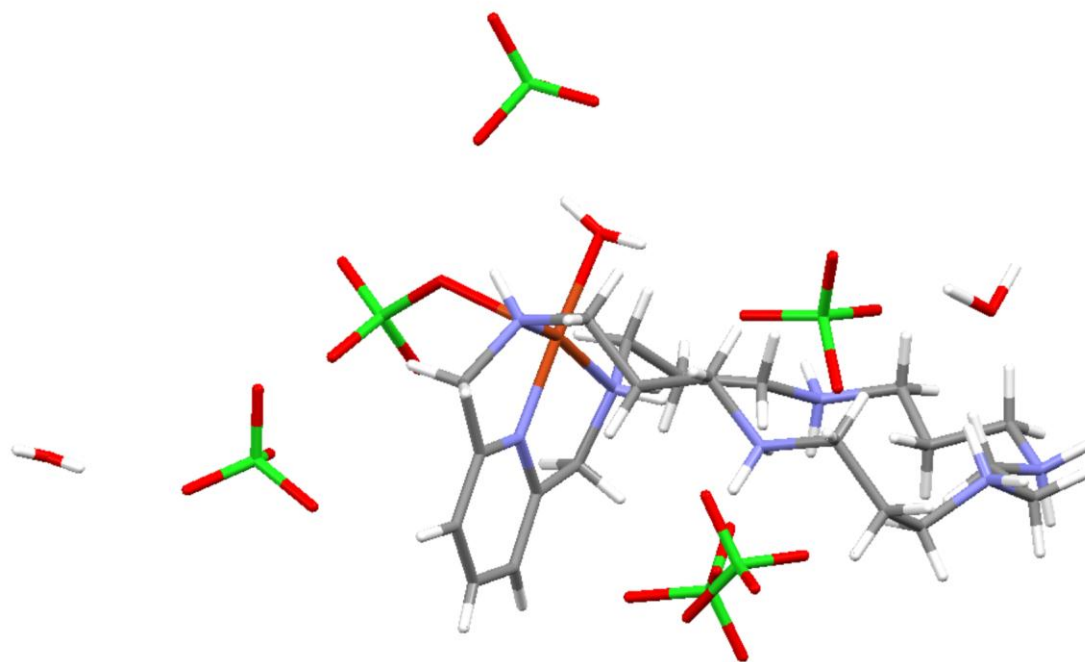

**Table S1** Crystallographic Data for  $[(\text{CuH}_4\text{L2})(\text{H}_2\text{O})(\text{ClO}_4)] (\text{ClO}_4)_5 \cdot 3(\text{H}_2\text{O})$

| (1)                                          |                                                                  |
|----------------------------------------------|------------------------------------------------------------------|
| Empirical formula                            | $\text{C}_{21}\text{H}_{53}\text{Cl}_6\text{CuN}_7\text{O}_{28}$ |
| Fw                                           | 1127.94                                                          |
| Crystal Size,mm                              | $0.20 \times 0.10 \times 0.06$                                   |
| Cryst.System/s.g.                            | Pc 2 <sub>1</sub> b                                              |
| <i>T</i> ,K                                  | 293(2)                                                           |
| <i>a</i> ,Å                                  | 8.4130(2)                                                        |
| <i>b</i> ,Å                                  | 18.1930(5)                                                       |
| <i>c</i> , Å                                 | 28.4910(9)                                                       |
| <i>α</i> ,deg                                | 90°                                                              |
| <i>β</i> , deg                               | 90°                                                              |
| <i>γ</i> , deg                               | 90°                                                              |
| <i>V</i> , Å <sup>3</sup>                    | 4360.8(2)                                                        |
| <i>Z</i>                                     | 4                                                                |
| <i>d</i> <sub>calc</sub> , g/cm <sup>3</sup> | 1.718                                                            |
| <i>μ</i> ,mm <sup>-1</sup>                   | 0.970                                                            |
| Reflect. collected                           | 5746                                                             |
| Unique reflections                           | 4496                                                             |
| Restraints                                   | 40                                                               |
| Parameters                                   | 578                                                              |
| R1, <i>w</i> R2 (all)                        | 0.0588, 0.1569                                                   |
| GOOF                                         | 1.067                                                            |

**Fig. S3** Distribution diagram for the system  $\text{Cu}^{2+}$ -**L1** (A)  $[\text{Cu}^{2+}] = [\text{L}] = 10^{-3}$  M; (B)  $[\text{L}] = 10^{-3}$  M,  $[\text{Cu}^{2+}] = 2 \times 10^{-3}$  M

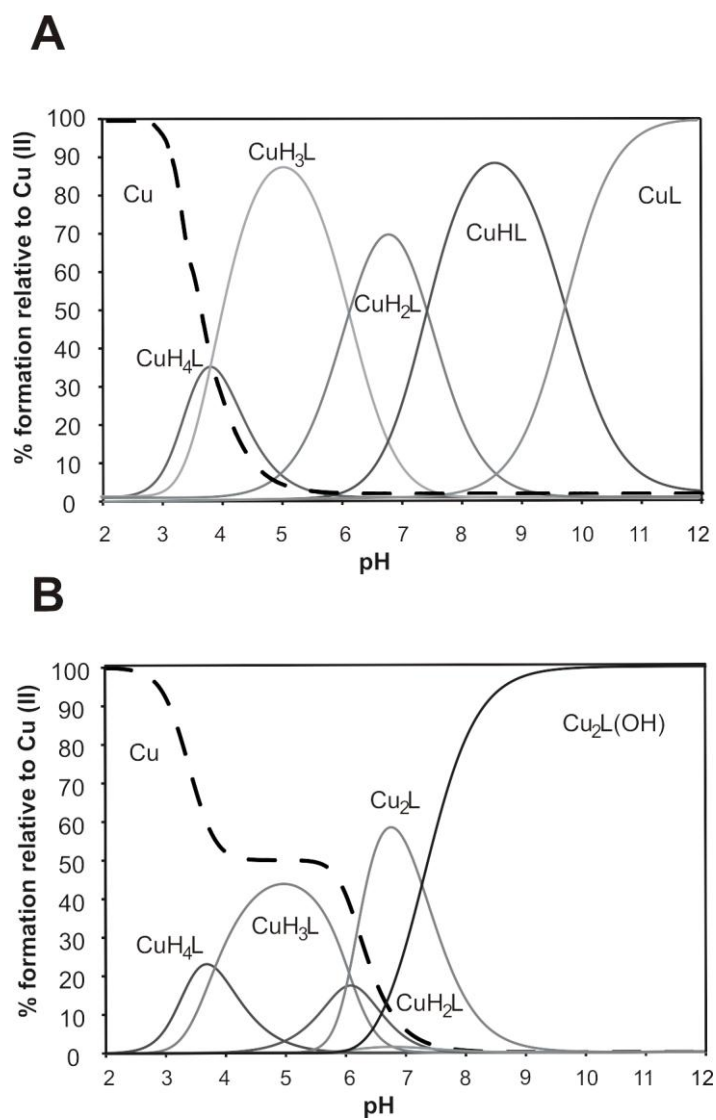

**Fig. S4** Distribution diagram for the system  $\text{Zn}^{2+}$ -**L1** (A)  $[\text{Zn}^{2+}] = [\text{L}] = 10^{-3}$  M; (B)  $[\text{L}] = 10^{-3}$  M,  $[\text{Zn}^{2+}] = 2 \times 10^{-3}$  M

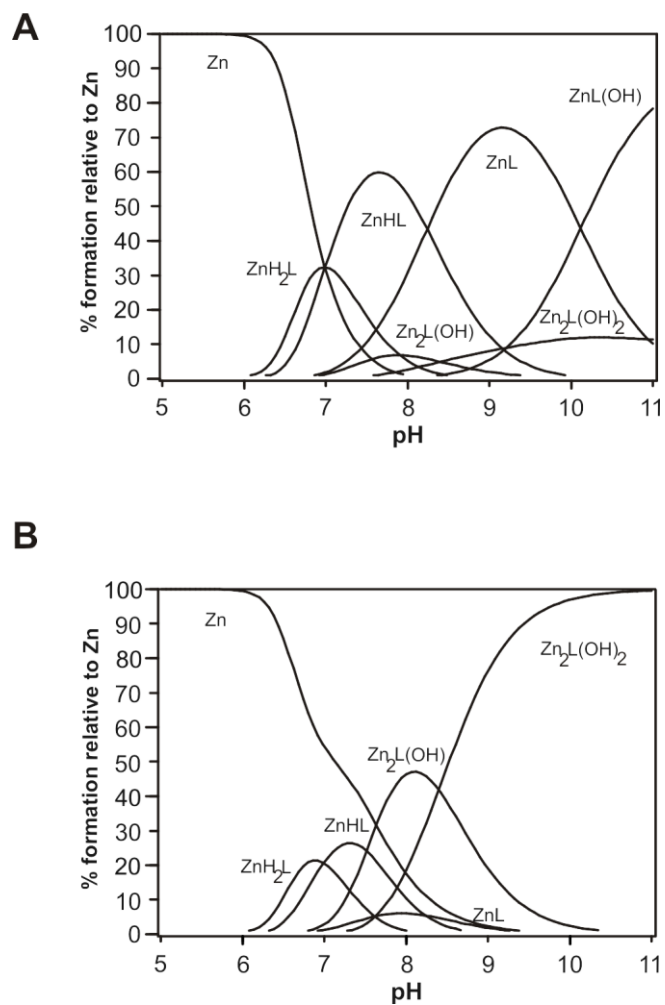

**Fig. S5** 400 MHz proton NMR spectra in D<sub>2</sub>O at 313 K of (A) Cu<sub>2</sub>L2-Im at pH 7.0 and (B) Cu<sub>2</sub>L2 at pH 7.0. The asterisks mark the residual solvent and impurity signals (\*, H<sub>2</sub>O; \*\*, HDO)

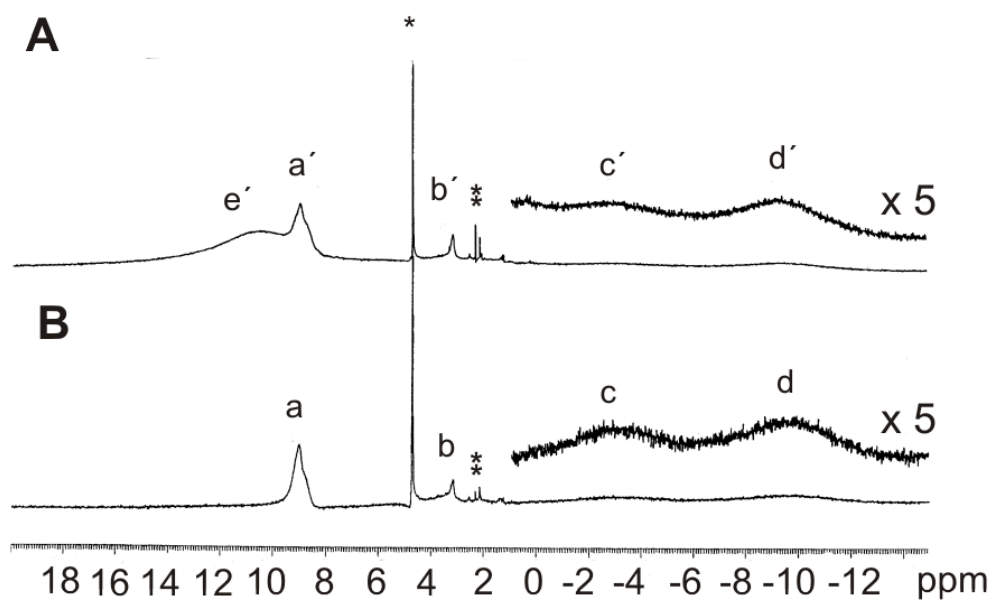

**Table S2**  $^1\text{H}$  NMR hyperfine-shifted resonances of  $\text{Cu}_2\text{L2}$ ,  $\text{Cu}_2\text{L2Im}$  complexes in  $\text{D}_2\text{O}$  at 313 K and pH 7.0.

| Syst.                    | Sig. | $\delta$<br>(ppm) | $N^\circ$<br>prot | Assign.              | Temperature<br>Dependence | $T_1$<br>(ms) | $\Delta\nu_{1/2}$<br>(Hz) | $T_2^a$<br>(ms) |
|--------------------------|------|-------------------|-------------------|----------------------|---------------------------|---------------|---------------------------|-----------------|
| $\text{Cu}_2\text{L2}$   | a    | 9.0               | 8                 | $\beta\text{CH}_2$   | Anti-Curie                | 2.1           | 200                       | 1.6             |
|                          | b    | 3.1               | 3                 | Hm,p-Py              | Anti-Curie                | 4.3           | 81                        | 3.9             |
|                          | c    | -3.2              | 24                | $\alpha\text{CH}_2$  | Curie                     | <1            | 1339                      | 0.24            |
|                          | d    | -9.8              |                   |                      | Curie                     | <1            | 1339                      | 0.24            |
| $\text{Cu}_2\text{L2Im}$ | e'   | 10.4              | ~3x2              | $\alpha\text{CH-Im}$ | Curie                     | 5.6           | ~880                      | ~0.36           |
|                          | a'   | 9.0               | 8                 | $\beta\text{CH}_2$   | Anti-Curie                | 5.4           | 278                       | 1.2             |
|                          | b'   | 3.2               | 3                 | Hm,p-Py              | Anti-Curie                | 7.3           | 81                        | 3.9             |
|                          | c'   | -3.1              | 24                | $\alpha\text{CH}_2$  | Curie                     | <1            | 1182                      | 0.27            |
|                          | d'   | -9.9              |                   |                      | Curie                     | <1            | 1391                      | 0.23            |

[a] Measured from the line width at half-height



### Scheme S1

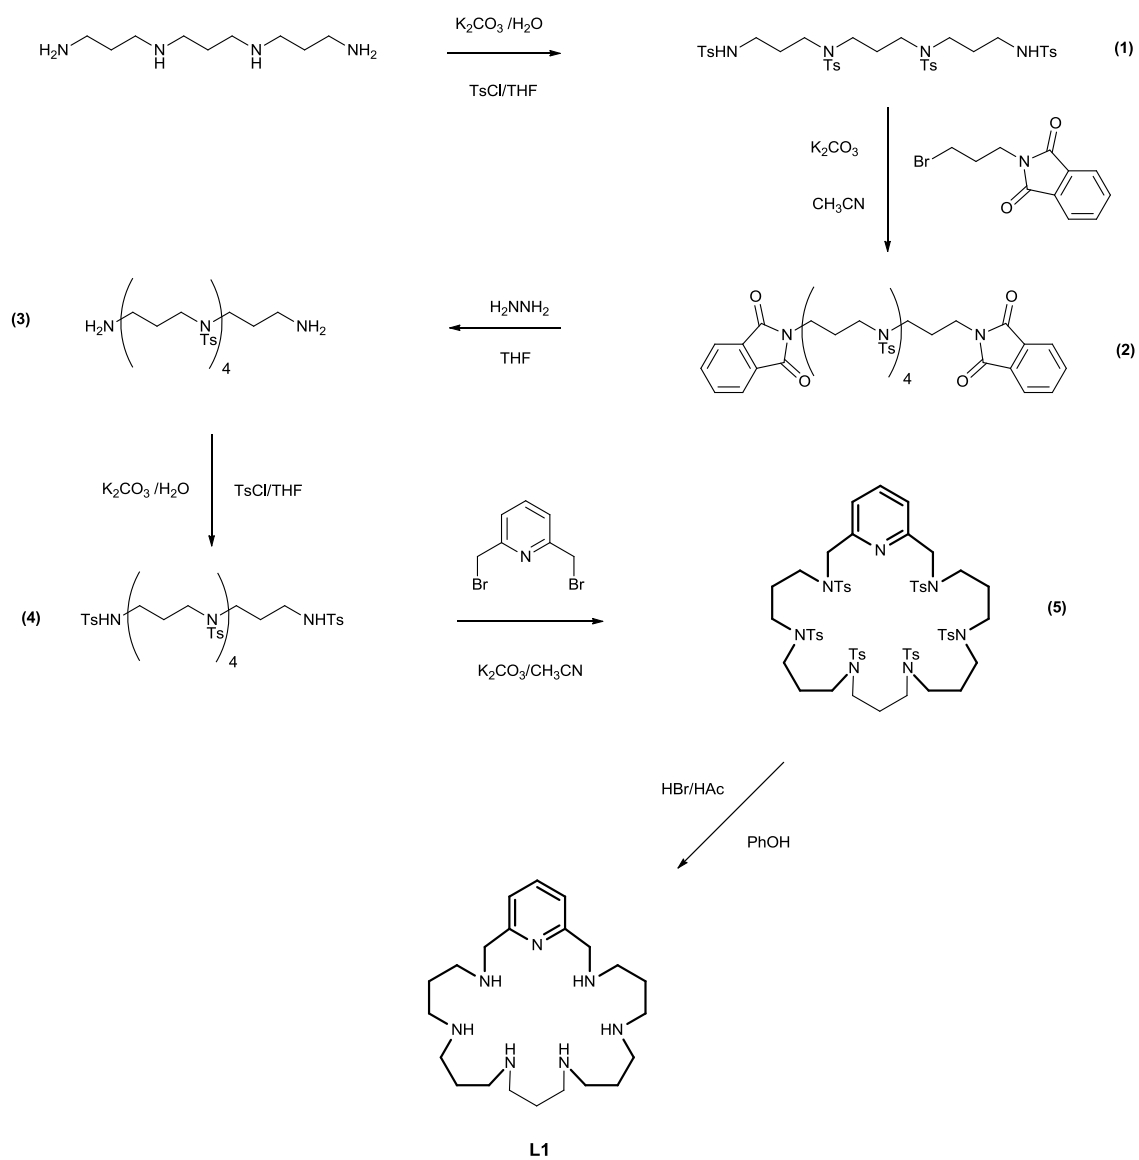

Supplement: c3dt51012c.pdf [file c3dt51012c.pdf]
